# Supplementary material for: Selective oxidation of 5-hydroxymethylfurfural into 2,5-diformylfuran over VPO catalysts under atmospheric pressure
Source: Royal Society of Chemistry journal article supplement (doi:10.1039/c9ra02213a), 2019-01-01
Supplement: c9ra02213a1.pdf [file c9ra02213a1.pdf]

## Supplementary information

Table.S1 The elements analysis of V<sub>2</sub>O<sub>5</sub> and VPO by ICP-OES

|                               | Al     | As     | Ba     | Ca     | Cr     | Cu     | Fe      | K      | Mg     | Mn     | Mo     |
|-------------------------------|--------|--------|--------|--------|--------|--------|---------|--------|--------|--------|--------|
| V <sub>2</sub> O <sub>5</sub> | 0.016  | 0.0001 | 0.001  | 0.0003 | 0.0008 | 0.0003 | 0.0031  | 0.0036 | 0.0004 | 0.0001 | 0.0052 |
| VPO                           | 0.0054 | 0.0001 | 0.0005 | 0.0094 | 0.0004 | 0.0003 | 0.0032  | 0.0005 | 0.0012 | 0.0001 | 0.002  |
| Na                            | Ni     | P      | Pb     | S      | Si     | Sn     | Sr      | Ti     | V      | Zn     | Zr     |
| 0.001                         | 0.0003 | 0.0005 | 0.0002 |        | 0.015  | 0.0003 | <0.0001 | 0.0001 |        | 0.0002 | 0.0007 |
| 0.0052                        | 0.0008 | 21.5   | 0.0007 | 0.024  | 0.0045 | 0.002  | <0.0001 | 0.0001 | 16.9   | 0.0008 | 0.0003 |
